# Supplementary material
Source: PubMed Central journal article supplement (PMC7794087)
Supplement: NIHMS1610589-supplement-13187_2020_1823_MOESM4_ESM.pdf [file NIHMS1610589-supplement-13187_2020_1823_MOESM4_ESM.pdf]

1. Participant ID Number \_\_\_\_\_

2. How old are you (in years)? \_\_\_\_\_

3. What is the highest level of school you have completed?

- |                                                                                           |                                                        |
|-------------------------------------------------------------------------------------------|--------------------------------------------------------|
| <input type="checkbox"/> 0 Never attended school / Kindergarten only                      | <input type="checkbox"/> 4 Some college, but no degree |
| <input type="checkbox"/> 1 Primary School (1 <sup>st</sup> grade – 8 <sup>th</sup> grade) | <input type="checkbox"/> 5 2-year college degree       |
| <input type="checkbox"/> 2 Some high school, but no diploma                               | <input type="checkbox"/> 6 4-year college degree       |
| <input type="checkbox"/> 3 High school diploma (or GED)                                   | <input type="checkbox"/> 7 Master's/ doctoral degree   |

4. What is your current relationship status?  1 Married  2 Widowed  3 Divorced  4 Separated  
 5 Living with partner but not married  6 Single, never married

5. Do you consider yourself to be Hispanic or Latina?  1 Yes  2 No

*This includes Puerto Rican, Cuban/Cuban American, Dominican (Republic), Mexican/Mexican American, etc.*

6. What race or races do you consider yourself to be? Please select one or more.

- |                                                   |                                                             |
|---------------------------------------------------|-------------------------------------------------------------|
| <input type="checkbox"/> 1 White                  | <input type="checkbox"/> 4 Native American/Alaskan Native   |
| <input type="checkbox"/> 2 Black/African American | <input type="checkbox"/> 5 Native Hawaiian/Pacific Islander |
| <input type="checkbox"/> 3 Asian                  | <input type="checkbox"/> 6 Other: _____                     |

7. What is the primary language spoken in your home?  1 English  2 Spanish  3 Other \_\_\_\_\_

8. Think of the primary language that you use in your home. Answer the following with the answers that best describe your situation.

|                                                          | Only English | English better than my native language | Both equally | Native better than English | Only my native language |
|----------------------------------------------------------|--------------|----------------------------------------|--------------|----------------------------|-------------------------|
| a) In general, what language(s) do you read and speak?   | ①            | ②                                      | ③            | ④                          | ⑤                       |
| b) What language do you usually speak at home?           | ①            | ②                                      | ③            | ④                          | ⑤                       |
| c) In what language do you usually think?                | ①            | ②                                      | ③            | ④                          | ⑤                       |
| d) What language do you usually speak with your friends? | ①            | ②                                      | ③            | ④                          | ⑤                       |

9. Were you born in the United States?  1 Yes  2 No

10. What is your country of birth? \_\_\_\_\_  0 I was born in the U.S.

11. How old were you when you moved to the United States?  0 I was born in the U.S.

Weeks \_\_\_\_\_ Months \_\_\_\_\_ Years \_\_\_\_\_

12. How tall are you? Feet \_\_\_\_\_ Inches \_\_\_\_\_

63. Have you ever had cancer of any kind? 1  Yes 2  No 3  Not sure/ Do not know

64. Have you ever had breast cancer? 1  Yes 2  No 3  Not sure/ Do not know

65. How often do you worry about getting breast cancer?

1  Always 2  Very Often 3  Sometimes 4  Rarely 5  Never

66. How often does worrying about cancer affect your mood?

1  Always 2  Very Often 3  Sometimes 4  Rarely 5  Never

67. What members of your family have ever had cancer of any kind? 0  None

1  Biological Father 3  Full Brothers (who have the same biological mom/dad as you)  
2  Biological Mother 4  Full Sisters (who have the same biological mom/dad as you)

68. What members of your family have ever had had breast cancer? 0  None

1  Biological Father 3  Full Brothers (who have the same biological mom/dad as you)  
2  Biological Mother 4  Full Sisters (who have the same biological mom/dad as you)

69. Some people have a higher chance of getting some cancers. These people may have a cancer gene. These cancers can be prevented through screening and early treatment. Please answer the following questions to the best of your ability:

|                                                                                                          | True                       | False                      | I Don't Know               |
|----------------------------------------------------------------------------------------------------------|----------------------------|----------------------------|----------------------------|
| a. A parent can pass a cancer gene to their child that increases their child's chance of getting cancer. | 1 <input type="checkbox"/> | 2 <input type="checkbox"/> | 3 <input type="checkbox"/> |
| b. A person who does not have a cancer gene can still get cancer.                                        | 1 <input type="checkbox"/> | 2 <input type="checkbox"/> | 3 <input type="checkbox"/> |
| c. Very few women have a cancer gene that increases their chance of getting breast cancer.               | 1 <input type="checkbox"/> | 2 <input type="checkbox"/> | 3 <input type="checkbox"/> |
| d. A person with a family member who had cancer has a higher chance of getting cancer                    | 1 <input type="checkbox"/> | 2 <input type="checkbox"/> | 3 <input type="checkbox"/> |
| e. Cancer at younger ages (<50) is LESS likely due to a person having a cancer gene.                     | 1 <input type="checkbox"/> | 2 <input type="checkbox"/> | 3 <input type="checkbox"/> |
| f. Mammograms often do not detect cancer until after it spreads to other parts of the body.              | 1 <input type="checkbox"/> | 2 <input type="checkbox"/> | 3 <input type="checkbox"/> |
| g. Having the breasts removed will definitely prevent breast cancer.                                     | 1 <input type="checkbox"/> | 2 <input type="checkbox"/> | 3 <input type="checkbox"/> |
| h. An unhealthy environment may increase a person's chance of getting breast cancer.                     | 1 <input type="checkbox"/> | 2 <input type="checkbox"/> | 3 <input type="checkbox"/> |
| i. An unhealthy diet may increase a person's chance of getting breast cancer.                            | 1 <input type="checkbox"/> | 2 <input type="checkbox"/> | 3 <input type="checkbox"/> |
| j. I want to get a test that will tell me if I have a cancer gene.                                       | 1 <input type="checkbox"/> | 2 <input type="checkbox"/> | 3 <input type="checkbox"/> |

70. How much are you willing to pay out of pocket to find out if you have a cancer gene? 0  Nothing

1  \$25 3  \$250-\$400 5  \$1000+  
2  \$50-\$200 4  \$500-\$900

71. What reasons do you want to get a test that will tell you if you have a cancer gene? 0  I do not want this.

1  To plan for the future  
2  To guide decisions about when to have a baby  
3  To know about need for additional cancer screening

72. Please indicate your level of agreement with the following statements:

| Genetic testing for cancer prevention ... | Disagree |   |   |   |   | Agree |   |   |   |   |
|-------------------------------------------|----------|---|---|---|---|-------|---|---|---|---|
| a) ... is a good idea                     | ①        | ② | ③ | ④ | ⑤ | ①     | ② | ③ | ④ | ⑤ |
| b) ... is a frightening idea              | ①        | ② | ③ | ④ | ⑤ | ①     | ② | ③ | ④ | ⑤ |

|                                        |   |   |   |   |   |
|----------------------------------------|---|---|---|---|---|
| c) ... is a reassuring idea            | ① | ② | ③ | ④ | ⑤ |
| d) ... is something everyone should do | ① | ② | ③ | ④ | ⑤ |

**73. If you found out that you had a higher chance of getting breast cancer, which of the following would you choose to do? You may choose more than one.**

- 1  Do nothing
- 2  Screening with mammograms or other tests early and often
- 3  Take medicine every day so I do not get cancer
- 4  Surgery to remove breasts (mastectomy)
- 5  Surgery to remove both ovaries (oophorectomy)
